# Supplementary material for: The Activating NKG2C Receptor Is Significantly Reduced in NK Cells after Allogeneic Stem Cell Transplantation in Patients with Severe Graft-versus-Host Disease
Source: MDPI journal article supplement (doi:10.3390/ijms17111797), 2016-10-27
Supplement: s1 [file s1]

# Supplementary Materials: The Activating NKG2C Receptor Is Significantly Reduced in NK Cells after Allogeneic Stem Cell Transplantation in Patients with Severe Graft-versus-Host Disease

Lambros Kordelas, Nina-Kristin Steckel, Peter A. Horn, Dietrich W. Beelen and Vera Rebmann

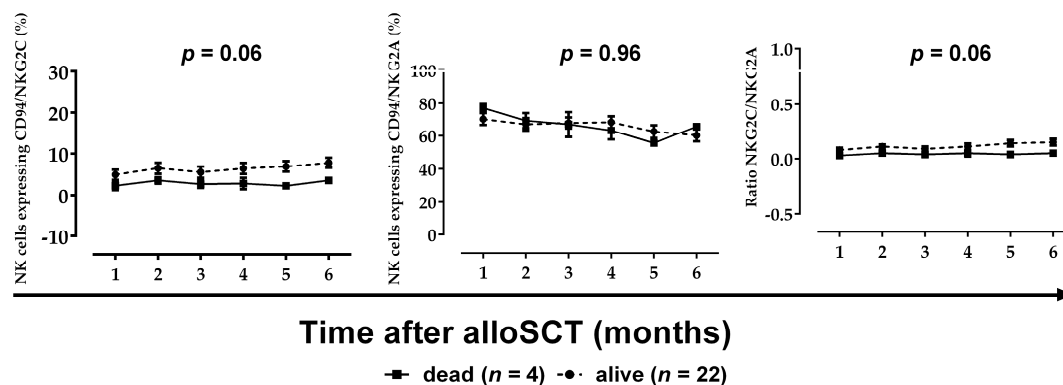

**Figure S1.** The proportion of NK cells expressing CD94/NKG2C, CD94/NKG2A and to the ratio NKG2C/NKG2A in relation of the survival during the first year after alloSCT. 22 patients survived the first year of alloSCT and 4 patients passed away within the first year of alloSCT. Two-way ANOVA was used for statistical analysis.
